# Supplementary material for: A low FODMAP diet is associated with changes in the microbiota and reduction in breath hydrogen but not colonic volume in healthy subjects
Source: PubMed Central journal article supplement (PMC6062106; doi:10.1371/journal.pone.0201410), 2018-07-26
Supplement: pone.0201410.s006.pdf [file pone.0201410.s006.pdf]

**S2 Table. Detailed dietary breakdown.**

| <b>Food component</b> | <b>MD-BL</b> | <b>MD-PI</b>     | <b>OF-BL</b> | <b>OF-PI</b>     |
|-----------------------|--------------|------------------|--------------|------------------|
| Energy (kcal/d)       | 2044(474)    | 1904(648)        | 2224(539)    | 2068(744)        |
| Protein (g/d)         | 81.2(23.7)   | 91(41.7)         | 95.1(26)     | 99.3(46.8)       |
| Fat (g/d)             | 83.4(24.6)   | 82(29.7)         | 90.6(29)     | 85.3(32)         |
| Carbohydrate (g/d)    | 234(46.8)    | <b>189(63.5)</b> | 246(72.5)    | <b>200(85.8)</b> |
| Sugar (g/d)           | 102(36.5)    | <b>76(31.6)</b>  | 92(31)       | <b>63(31)</b>    |
| Starch (g/d)          | 123.7(38.4)  | 126(39.7)        | 150(56)      | 140(55)          |
| Fibre (g/d)           | 18.9(5.5)    | 19.6(7.6)        | 21(7)        | 19.7(5.8)        |
| Total FODMAPs (g/d)   | 17.7(7.4)    | <b>1.7(1.6)</b>  | 18.9(8.0)    | <b>2.5(1.6)</b>  |
| Fructans (g/d)        | 2.4(0.9)     | <b>0.3(0.5)</b>  | 2.9(1.4)     | <b>0.2(0.2)</b>  |
| GOS (g/d)             | 0.6(0.3)     | <b>0.1(0.3)</b>  | 0.8(0.5)     | <b>0.2 (0.3)</b> |
| Lactose (g/d)         | 9.9(6.8)     | <b>0.69(0.8)</b> | 10.6(6.0)    | <b>1.4(1.5)</b>  |
| Total fructose (g/d)  | 17.1(8.6)    | <b>11.1(7.0)</b> | 14.6(8.1)    | <b>10.6(7.8)</b> |
| Excess fructose (g/d) | 3.8(2.4)     | <b>0.4(0.3)</b>  | 3.5(2.3)     | <b>0.5(0.3)</b>  |
| Sorbitol (g/d)        | 0.7(0.7)     | <b>0.4(0.6)</b>  | 0.7(0.5)     | <b>0.9(0.9)</b>  |
| Mannitol (g/d)        | 0.2(0.2)     | 0.7(0.1)         | 0.3(0.4)     | <b>0.9(0.2)</b>  |

Table of mean daily intake for individual dietary components. The intervention supplements are not included. MD, maltodextrin; OF, oligofructose; BL, baseline; PI, post-intervention. SD values given in brackets. Values which differ significantly from baseline are shown in bold.
