# Supplementary material for: A low FODMAP diet is associated with changes in the microbiota and reduction in breath hydrogen but not colonic volume in healthy subjects
Source: PubMed Central journal article supplement (PMC6062106; doi:10.1371/journal.pone.0201410), 2018-07-26
Supplement: pone.0201410.s007.pdf [file pone.0201410.s007.pdf]

**S3 Table. Detailed microbiota changes.**

| Genus level taxon                                                                       | Fold change to BL |               |               |       |      |
|-----------------------------------------------------------------------------------------|-------------------|---------------|---------------|-------|------|
|                                                                                         | BL                | MD            | OF            | MD    | OF   |
| Actinobacteria; Coriobacteriia; Coriobacteriales; Coriobacteriaceae; Eggerthella        | 0.05 %            | <b>0.15 %</b> | 0.02 %        | 2.93  | 0.45 |
| Bacteroidetes; Bacteroidia; Bacteroidales; Porphyromonadaceae; Butyricimonas            | 0.02 %            | 0.03 %        | <b>0.05 %</b> | 1.75  | 2.56 |
| Bacteroidetes; Bacteroidia; Bacteroidales; Porphyromonadaceae; Parabacteroides          | 0.13 %            | <b>0.37 %</b> | <b>0.26 %</b> | 2.91  | 2.06 |
| Bacteroidetes; Bacteroidia; Bacteroidales; Prevotellaceae; Paraprevotella               | 0.01 %            | 0.01 %        | <b>0.07 %</b> | 0.95  | 5.65 |
| Bacteroidetes; Bacteroidia; Bacteroidales; Prevotellaceae; Prevotella                   | 0.63 %            | <b>0.19 %</b> | 1.57 %        | 0.30  | 2.49 |
| Firmicutes; Bacilli; Lactobacillales; Lactobacillaceae; Lactobacillus                   | 0.03 %            | 0.04 %        | <b>0.14 %</b> | 1.16  | 4.49 |
| Firmicutes; Clostridia; Clostridiales; FamilyXIIncertaeSedis; Parvimonas                | 0.00 %            | <b>0.01 %</b> | 0.00 %        | 23.39 | 0.74 |
| Firmicutes; Clostridia; Clostridiales; Lachnospiraceae; Anaerospobacter                 | 0.01 %            | <b>0.00 %</b> | 0.01 %        | 0.25  | 0.96 |
| Firmicutes; Clostridia; Clostridiales; Lachnospiraceae; Blautia                         | 7.07 %            | 6.09 %        | <b>4.12 %</b> | 0.86  | 0.58 |
| Firmicutes; Clostridia; Clostridiales; Peptostreptococcaceae; IncertaeSedis             | 0.37 %            | 0.43 %        | <b>0.21 %</b> | 1.19  | 0.57 |
| Firmicutes; Clostridia; Clostridiales; Ruminococcaceae; Anaerotruncus                   | 0.23 %            | <b>0.41 %</b> | 0.25 %        | 1.77  | 1.09 |
| Firmicutes; Clostridia; Clostridiales; Ruminococcaceae; Flavonifractor                  | 0.40 %            | <b>0.88 %</b> | 0.34 %        | 2.21  | 0.85 |
| Firmicutes; Clostridia; Clostridiales; Ruminococcaceae; Oscillibacter                   | 0.08 %            | <b>0.14 %</b> | 0.10 %        | 1.85  | 1.34 |
| Firmicutes; Clostridia; Clostridiales; Ruminococcaceae; Ruminococcus                    | 4.38 %            | 3.40 %        | <b>2.03 %</b> | 0.78  | 0.46 |
| Firmicutes; Erysipelotrichi; Erysipelotrichales; Erysipelotrichaceae; Turicibacter      | 0.03 %            | 0.04 %        | <b>0.01 %</b> | 1.39  | 0.21 |
| Firmicutes; Erysipelotrichia; Erysipelotrichales; Erysipelotrichaceae; Catenibacterium  | 0.02 %            | 0.02 %        | <b>0.08 %</b> | 0.86  | 3.31 |
| Firmicutes; Negativicutes; Selenomonadales; Veillonellaceae; Dialister                  | 1.05 %            | <b>0.34 %</b> | 1.75 %        | 0.32  | 1.67 |
| Proteobacteria; Deltaproteobacteria; Desulfovibrionales; Desulfovibrionaceae; Bilophila | 0.04 %            | <b>0.08 %</b> | 0.07 %        | 2.34  | 2.03 |

Complete list of significant genus level changes post-intervention compared to the baseline. FDR corrected p-values >0.05 are show in bold
