# Supplementary material for: A low FODMAP diet is associated with changes in the microbiota and reduction in breath hydrogen but not colonic volume in healthy subjects
Source: PubMed Central journal article supplement (PMC6062106; doi:10.1371/journal.pone.0201410), 2018-07-26
Supplement: pone.0201410.s008.pdf [file pone.0201410.s008.pdf]

**S4 Table. Faecal short chain fatty acid concentrations.**

|       | <b>Acetic</b> | <b>Propanoic</b> | <b>Isobutyric</b> | <b>Butyric</b> | <b>Isovaleric</b> | <b>Valeric</b> |
|-------|---------------|------------------|-------------------|----------------|-------------------|----------------|
| MD-BL | 24.0 (4.1)    | 6.6 (3.4)        | 1.3 (0.4)         | 8.9 (6.2)      | 1.4 (0.5)         | 1.4 (0.5)      |
| MD-PI | 23.0 (3.1)    | 6.2 (3.1)        | 1.3 (0.5)         | 8.4 (6.9)      | 1.6 (0.7)         | 1.3 (0.7)      |
| OF-BL | 25.6 (3.8)    | 9.1 (5.7)        | 1.4 (0.7)         | 12.5 (8.6)     | 1.6 (0.8)         | 2.0 (1.4)      |
| OF-PI | 24.0 (3.1)    | 6.4 (3.6)        | 1.1 (0.4)         | 8.6 (6.2)      | 1.2 (0.5)         | 1.2 (0.6)      |

Short chain fatty acid concentrations per study group. MD, maltodextrin; OF, oligofructose; BL, baseline; PI, post-intervention. No significant differences between the groups. Values shown are mean (SD)  $\mu\text{mol/g}$  wet stool per group.
