# Supplementary material for: A low FODMAP diet is associated with changes in the microbiota and reduction in breath hydrogen but not colonic volume in healthy subjects
Source: PubMed Central journal article supplement (PMC6062106; doi:10.1371/journal.pone.0201410), 2018-07-26
Supplement: pone.0201410.s009.pdf [file pone.0201410.s009.pdf]

**S5 Table. Associations between the microbiota and short chain fatty acids.**

| Genus level taxon                                                                       | Acetic | Butyric | Propanoic | Isobutyric | Isovaleric | Valeric |
|-----------------------------------------------------------------------------------------|--------|---------|-----------|------------|------------|---------|
| Actinobacteria; Actinobacteria; Micrococcales; Micrococcaceae; Rothia                   |        |         | -         | -          | -          | -       |
| Actinobacteria; Coriobacteriia; Coriobacteriales; Coriobacteriaceae; Adlercreutzia      | -      | -       | -         |            |            | -       |
| Actinobacteria; Coriobacteriia; Coriobacteriales; Coriobacteriaceae; Eggerthella        | -      |         |           |            |            |         |
| Actinobacteria; Coriobacteriia; Coriobacteriales; Coriobacteriaceae; uncultured         | -      | -       | -         |            |            |         |
| Bacteroidetes; Bacteroidia; Bacteroidales; Porphyromonadaceae; Butyricimonas            | -      |         | -         |            |            |         |
| Bacteroidetes; Bacteroidia; Bacteroidales; Porphyromonadaceae; Odoribacter              | -      |         | -         |            |            | -       |
| Bacteroidetes; Bacteroidia; Bacteroidales; Porphyromonadaceae; Parabacteroides          |        | -       |           |            |            |         |
| Bacteroidetes; Bacteroidia; Bacteroidales; Rikenellaceae; Alistipes                     |        | -       |           |            |            |         |
| Firmicutes; Clostridia; Clostridiales; Christensenellaceae; Christensenella             |        | -       |           |            |            |         |
| Firmicutes; Clostridia; Clostridiales; FamilyXIIIIncertaeSedis; IncertaeSedis           | -      | -       |           |            |            |         |
| Firmicutes; Clostridia; Clostridiales; Lachnospiraceae; Anaerostipes                    |        |         |           | -          | -          |         |
| Firmicutes; Clostridia; Clostridiales; Lachnospiraceae; Roseburia                       | +      | +       |           |            |            |         |
| Firmicutes; Clostridia; Clostridiales; Ruminococcaceae; Anaerofilum                     |        |         |           |            | +          |         |
| Firmicutes; Clostridia; Clostridiales; Ruminococcaceae; Flavonifractor                  | -      |         |           |            | +          |         |
| Firmicutes; Clostridia; Clostridiales; Ruminococcaceae; Ruminococcus                    |        |         |           | +          | +          |         |
| Firmicutes; Erysipelotrichia; Erysipelotrichales; Erysipelotrichaceae; uncultured       | -      |         |           |            |            |         |
| Firmicutes; Negativicutes; Selenomonadales; Acidaminococcaceae; Acidaminococcus         | +      |         | +         |            |            | +       |
| Firmicutes; Negativicutes; Selenomonadales; Acidaminococcaceae; Succiniclasticum        | +      | +       |           |            |            |         |
| Firmicutes; Negativicutes; Selenomonadales; Veillonellaceae; Veillonella                |        |         |           | -          | -          |         |
| Proteobacteria; Gammaproteobacteria; Pasteurellales; Pasteurellaceae; Haemophilus       |        |         |           | -          | -          |         |
| Verrucomicrobia; Verrucomicrobiae; Verrucomicrobiales; Verrucomicrobiaceae; Akkermansia |        | -       |           |            |            |         |

Statistically significant associations between genus level taxa and short chain fatty acids, across both time points, showing positive or negative associations calculated with linear mixed models
